Development 133, 3495 (2006) doi:10.1242/dev.02548

## Promotion of oogenesis and embryogenesis in the *C. elegans* gonad by EFL-1/DPL-1 (E2F) does not require LIN-35 (pRB)

**Woo Chi and Valerie Reinke** *Development*, **133**, 3147-3157.

There was an error in the title of the ePress version of this article published online on 19 July 2006. E2F was mistakenly written as EZF. The final online version and the print version are both correct.

We apologise to authors and readers for this mistake.
